## Limits on prediction in language comprehension:

### A multi-lab failure to replicate evidence for probabilistic pre-activation of phonology

Mante S. Nieuwland<sup>1,5</sup>, Stephen Politzer-Ahles<sup>2,10</sup>, Evelien Heyselaar<sup>3</sup>, Katrien Segaert<sup>3</sup>, Emily Darley<sup>4</sup>, Nina Kazanina<sup>4</sup>, Sarah Von Grebmer Zu Wolfsturn<sup>4</sup>, Federica Bartolozzi<sup>5</sup>, Vita Kogan<sup>5</sup>, Aine Ito<sup>5,10</sup>, Diane Mézière<sup>5</sup>, Dale J. Barr<sup>6</sup>, Guillaume Rousselet<sup>6</sup>, Heather J. Ferguson<sup>7</sup>, Simon Busch-Moreno<sup>8</sup>, Xiao Fu<sup>8</sup>, Jyrki Tuomainen<sup>8</sup>, Eugenia Kulakova<sup>9</sup>, E. Matthew Husband<sup>10</sup>, David I. Donaldson<sup>11</sup>, Zdenko Kohút<sup>12</sup>, Shirley-Ann Rueschemeyer<sup>12</sup>,

Falk Huettig<sup>1</sup>

<sup>1</sup> Max Planck Institute for Psycholinguistics, Nijmegen, The Netherlands

<sup>2</sup> Department of Chinese and Bilingual Studies, The Hong Kong Polytechnic University, Kowloon, Hong Kong

<sup>3</sup> School of Psychology, University of Birmingham, Birmingham, United Kingdom

<sup>4</sup> School of Experimental Psychology, University of Bristol, Bristol, United Kingdom

<sup>5</sup> School of Philosophy, Psychology and Language Sciences, University of Edinburgh, Edinburgh, United Kingdom

<sup>6</sup> Institute of Neuroscience and Psychology, University of Glasgow, Glasgow, United Kingdom

<sup>7</sup> School of Psychology, University of Kent, Canterbury, United Kingdom

<sup>8</sup> Division of Psychology and Language Sciences, University College London, London, United Kingdom

<sup>9</sup> Institute of Cognitive Neuroscience, University College London, London, United Kingdom

<sup>10</sup> Faculty of Linguistics, Philology & Phonetics; University of Oxford, Oxford, United Kingdom

<sup>11</sup> Department of Psychology, University of Stirling, Stirling, United Kingdom

<sup>12</sup> Department of Psychology, University of York, York, United Kingdom

### Corresponding author:

Mante S. Nieuwland, Max Planck Institute for Psycholinguistics, Wundtlaan 1, 6525 XD Nijmegen, The Netherlands. E-mail: [mante.nieuwland@mpi.nl](mailto:mante.nieuwland@mpi.nl), phone: +31-24-3521911

1 In the last few decades, the idea that people routinely and implicitly predict upcoming words  
2 during language comprehension has turned from a controversial hypothesis to a widely-  
3 accepted assumption. Current theories of language comprehension<sup>1-3</sup> posit prediction, or  
4 context-based pre-activation, as an essential mechanism occurring at all levels of linguistic  
5 representation (semantic, morpho-syntactic and phonological/orthographic) and facilitating  
6 the integration of words into the unfolding discourse representation. The strongest evidence  
7 to date for phonological pre-activation comes from DeLong, Urbach and Kutas<sup>4</sup>, who  
8 monitored participants' electrophysiological brain responses as they read sentences, presented  
9 one word at a time, with expected/unexpected indefinite article + noun combinations like,  
10 "The day was breezy so the boy went outside to fly a kite/an airplane". The sentences varied  
11 expectations ('cloze' probability) for a consonant- or vowel-initial noun, as determined in a  
12 sentence-completion task using other participants. Expectedly, the amplitude of the N400  
13 event-related potential (ERP) decreased (became less negative) with increasing cloze  
14 reflecting ease of processing<sup>5-6</sup>. Whereas the decreased N400 at the noun could be due to its  
15 pre-activation or because high-cloze nouns are easier to integrate, crucially, N400s at the  
16 immediately-preceding article *a* or *an* showed the same relationship with cloze, i.e.,  
17 encountering an indefinite article that mismatched a highly-expected word (e.g., *an* when  
18 expecting *kite*) also elicited a larger N400. This led to the claim that participants pre-activated  
19 highly-expected nouns, including their initial phonemes, based on the preceding context, with  
20 larger N400s on mismatching articles reflecting disconfirmation of this prediction.

21 The DeLong et al. study warranted stronger conclusions than related results available  
22 at the time. Unlike previous work, it did not rely on the precursory visual-depiction of  
23 upcoming nouns, clearly de-confounded prediction and integration effects, and tested for  
24 graded phonological pre-activation of specific word form. Correspondingly, the study has  
25 been enthusiastically received as strong evidence for probabilistic phonological pre-

26 activation, receiving over 650 citations to date and featuring in authoritative reviews<sup>2-3</sup>.  
27 However, there is good cause to question the soundness of the original finding (and the  
28 appropriateness of the analysis used). Attempts to replicate the critical article-effect have  
29 failed<sup>7</sup>. Moreover, an earlier, alternative analysis of the same data by the authors<sup>8</sup> failed to  
30 reach statistical significance, but was omitted from the published report.

31 To obtain more definitive evidence, we conducted a direct replication study spanning  
32 9 laboratories ( $N_{total} = 334$ ). We pre-registered one replication analysis that was faithful to the  
33 original, and one single-trial analysis that modeled subject- and item-level variance using  
34 linear mixed-effects models. Applying the replication analysis to our article data (Figure 1a),  
35 the original finding did not replicate: no laboratory observed a significant negative  
36 relationship between cloze and N400 at central-parietal electrodes. In contrast, the negative  
37 relationship was successfully replicated for the nouns: 6 laboratories observed such an effect  
38 and 2 laboratories observed relatively strong but non-significant effects in the expected  
39 direction (range  $r = .30$  to  $.50$ ). In the single-trial analysis (Fig. 1b-c), there was no  
40 statistically significant effect of cloze on article-N400s, also with stricter control for pre-  
41 article voltage levels (Supplementary Fig. 1). Crucially, there was a strong and significant  
42 cloze effect on noun-N400s (in all laboratories), which was significantly different from that  
43 on article-N400s. We observed no significant differences between laboratories for article or  
44 noun effects. Exploratory Bayesian analyses with priors based on DeLong et al. further  
45 support our conclusions (Fig. 1d, Supplementary Fig. 2). Finally, a control experiment  
46 confirmed our participants' sensitivity to the a/an rule during online language comprehension  
47 (Supplementary Fig. 3).

48 Despite a sample size 10 times larger than the original and improved statistical  
49 analysis, we observed no statistically significant effect of cloze on article-N400s, while  
50 replicating the strong and statistically significant effect of cloze on noun-N400s<sup>4,6</sup>. The effect

51 of cloze on article-N400s, if existent, must be very small to evade detection given our  
52 expansive approach. Whether such an effect would constitute convincing evidence for routine  
53 phonological pre-activation as assumed in theories of language comprehension<sup>3</sup> can be  
54 questioned, but, more generally, such an effect cannot be meaningfully studied in typical  
55 small-scale studies. Consequently, current theoretical positions may be based on potentially  
56 unreliable findings and require revision. In particular, the strong prediction view that claims  
57 that pre-activation routinely occurs across all – including phonological – levels<sup>3</sup>, can no  
58 longer be viewed as having strong empirical support.

59         Our results do not constitute evidence against prediction in general. We note a lack of  
60 convincing evidence specifically for phonological pre-activation, which would have to be  
61 measured before a noun appears and unobscured by processes instigated by the noun itself.  
62 However, our results neither support nor necessarily exclude phonological pre-activation.  
63 Unlike gender-marked articles<sup>9</sup> (e.g., in Dutch or Spanish) that agree with nouns irrespective  
64 of intervening words, English a/an articles index the subsequent word, which is not always a  
65 noun. Maybe our participants did not use mismatching articles to disconfirm predicted nouns,  
66 possibly because it was not a viable strategy (American and British English corpus data show  
67 a mere 33% chance that a noun follows such articles). Perhaps a revision of the predicted  
68 meaning is required to trigger differential ERPs.

69         DeLong et al. recently described filler-sentences in their experiment<sup>10, cf. 7</sup>, which  
70 were omitted from their original report, and were neither provided nor mentioned to us upon  
71 our request for their stimuli. DeLong used the existence of these filler-sentences to dismiss an  
72 alternative explanation of their results, namely that an unusual experimental context wherein  
73 every sentence contains an article-noun combination leads participants to strategically predict  
74 upcoming nouns. Importantly, we failed to replicate their article-effects *despite* an  
75 experimental context that could inadvertently encourage strategic prediction. Therefore, the

76 difference between their experiment and ours cannot explain the different results, and may  
77 even strengthen our conclusions.

78 In sum, our findings do not support a strong prediction view involving routine and  
79 probabilistic pre-activation of phonological word form based on preceding context.  
80 Moreover, our results further highlight the importance of direct replication, large sample size  
81 studies, transparent reporting and of pre-registration to advance reproducibility and  
82 replicability in the neurosciences.

<sup>1</sup> Hagoort, P. *Neurosci. Biobehav. Rev.* doi:10.1016/j.neubiorev.2017.01.048.

<sup>2</sup> Lau, E.F., Phillips, C. & Poeppel, D. *Nature Rev. Neurosci.* **9**, 920-933 (2008).

<sup>3</sup> Pickering, M.J. & Garrod, S. *Behav. Brain Sci.* **36**, 329-347 (2013).

<sup>4</sup> DeLong, K.A., Urbach, T.P. & Kutas, M. *Nature Neurosci.* **8**, 1117-1121 (2005).

<sup>5</sup> Kutas, M. & Hillyard, S.A. *Science* **207**, 203-205 (1980).

<sup>6</sup> Kutas, M. & Hillyard, S.A. *Nature* **307**, 161-163 (1984).

<sup>7</sup> Ito, A., Martin, A.E., & Nieuwland, M.S. *Lang. Cogn. Neurosci.* (2017).

<sup>8</sup> DeLong, K.A. (2009). Doctoral dissertation. San Diego: University of California.

<sup>9</sup> Van Berkum, J.J., Brown, C.M., Zwitserlood, P., Kooijman, V. & Hagoort, P. *J. Exp. Psychol. Learn. Mem. Cog.* **31**, 443-467 (2005).

<sup>10</sup> DeLong, K.A., Urbach, T.P. & Kutas, M. *Lang. Cogn. Neurosci.* (2017).

83 **Figure 1** A multi-lab failure to replicate evidence for probabilistic pre-activation of  
84 phonology. (a) Pre-registered replication analysis: Pearson's  $r$  correlations between ERP  
85 amplitude and article/noun cloze probability per EEG channel (\*  $P < 0.05$ ) and per  
86 laboratory. (b, c) Pre-registered single-trial analysis: (b) Grand-average ERPs elicited by  
87 relatively expected and unexpected words (cloze higher/lower than 50%) at electrode Cz,  
88 with standard deviation are shown in dotted lines, and (c) the relationship between cloze and  
89 N400 amplitude as illustrated by the mean ERP values per cloze value (number of  
90 observations reflected in circle size), along with the regression line and 95% confidence  
91 interval. A change in article cloze from 0 to 100 is associated with a change in amplitude of  
92  $0.296 \mu\text{V}$  (95% confidence interval:  $-.08$  to  $.67$ ),  $\chi^2(1) = 2.31$ ,  $p = .13$ . A change in noun-  
93 cloze from 0 to 100 is associated with a change in amplitude of  $2.22 \mu\text{V}$  (95% confidence  
94 interval:  $1.75$  to  $2.69$ ),  $\chi^2(1) = 56.5$ ,  $p < .001$ . The effect of cloze on noun-N400s was  
95 statistically different from its effect on article-N400s,  $\chi^2(1) = 31.38$ ,  $p < .001$ . (d) Bayes  
96 factor analysis associated with the replication analysis, quantifying the obtained evidence for  
97 the null hypothesis ( $H_0$ ) that N400 is not impacted by cloze, or for the alternative hypothesis  
98 ( $H_1$ ) that N400 is impacted by cloze with the size and direction of effect reported by DeLong  
99 et al. Scalp maps show the common logarithm of the replication Bayes factor for each  
100 electrode, capped at  $\log(100)$  for presentation purposes. Electrodes that yielded at least  
101 moderate evidence for or against the null hypothesis (Bayes factor of  $\geq 3$ ) are marked by an  
102 asterisk. At posterior electrodes where DeLong et al. found their effects, our article data  
103 yielded strong to extremely strong evidence for the null hypothesis, whereas our noun data  
104 yielded extremely strong evidence for the alternative hypothesis (upper graphs). These results  
105 were also found when applying a 500 ms pre-word baseline correction (lower graphs).

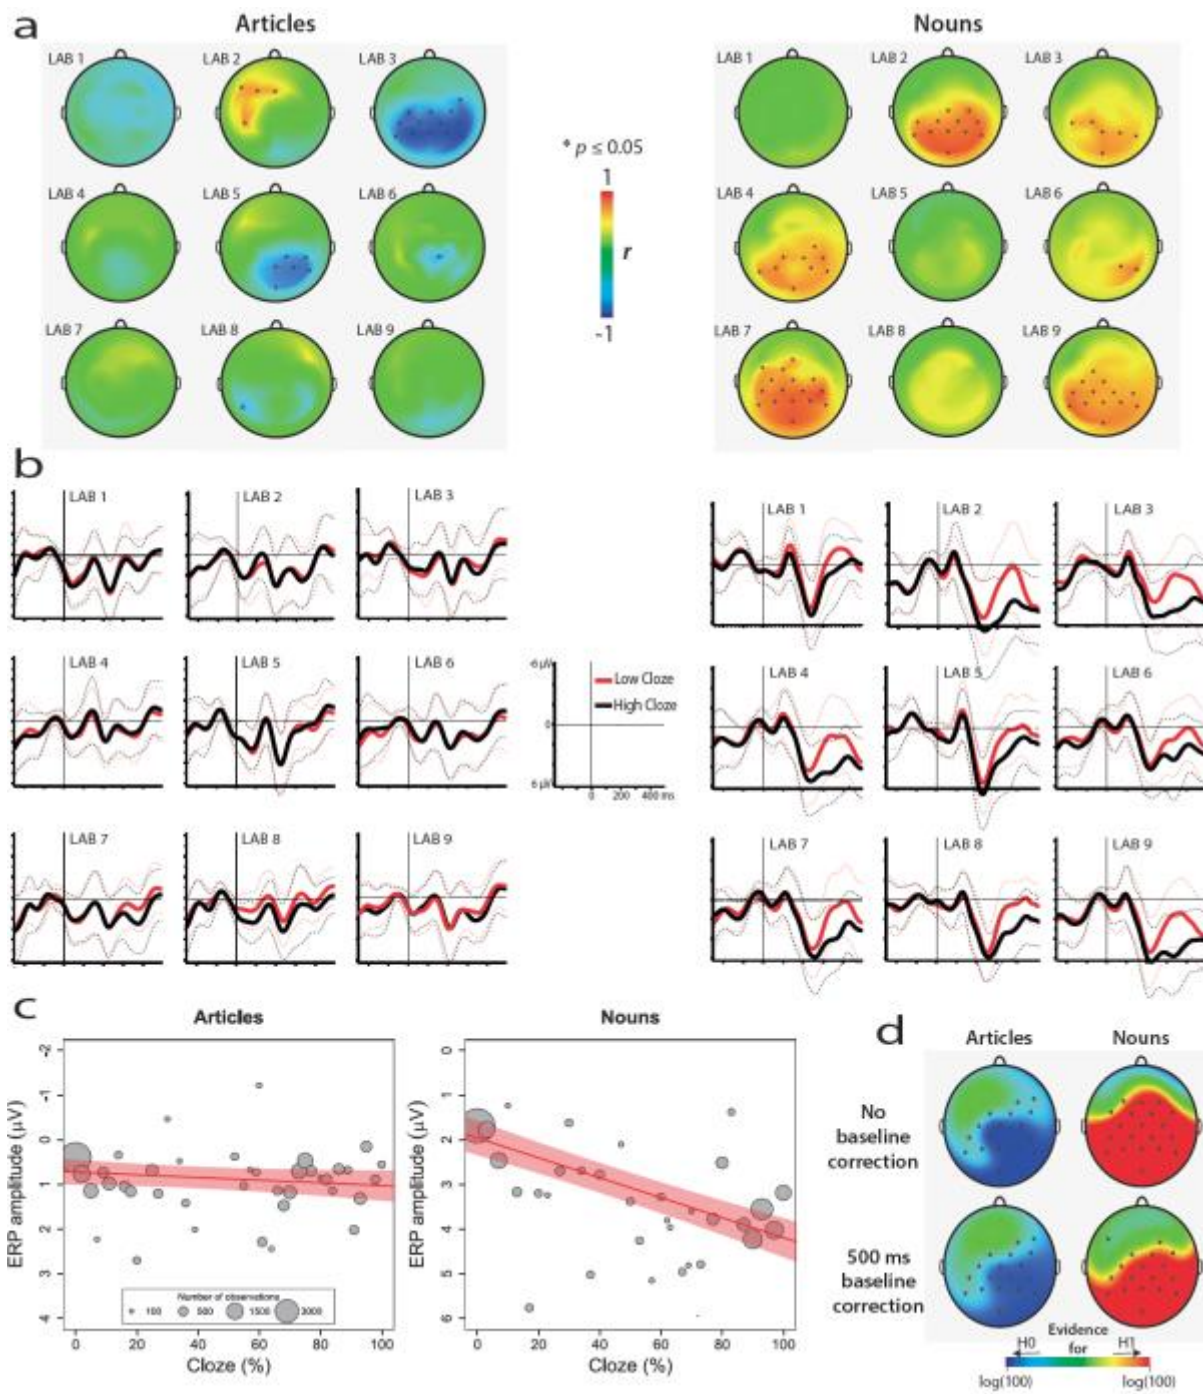

107 ONLINE METHODS

108           **Experimental design and materials.** Nieuwland requested all original materials from  
109 DeLong et al. with the stated purpose of direct replication (personal communication,  
110 November 4 and 19, 2015), upon which DeLong et al. made available the 80 sentences  
111 described in the original study. These sentences were then adapted from American to British  
112 spelling and underwent a few minor changes to ensure their suitability for British  
113 participants. The complete set of materials and the list of changes to the original materials are  
114 available online (Supplementary Table 1 and 2). The materials were 80 sentence contexts  
115 with two possible continuations each: a more or less expected indefinite article + noun  
116 combination. The noun was followed by at least one subsequent word. All article + noun  
117 continuations were grammatically correct. Within each participant, each article + noun  
118 combination served once as the more expected continuation and the other time as the less  
119 expected continuation, in different contexts. We divided the 160 items in two lists of 80  
120 sentences such that each list contained each noun only once. Each participant was presented  
121 with only one list (thus, each context was seen only once). One in four sentences was  
122 followed by a yes/no comprehension question, which yielded a mean comprehension  
123 accuracy of 86%. This percentage cannot be directly compared to that of DeLong et al.,  
124 because new comprehension questions had to be created in the absence of the original ones  
125 (but see exploratory single-trial analysis section, for relevant information).

126           Article cloze and noun cloze ratings were obtained from a separate group of native  
127 speakers of English who were students at the University of Edinburgh and did not participate  
128 in the ERP experiment. They were instructed to complete the sentence fragment with the best  
129 continuation that comes to mind<sup>1</sup>. We obtained article cloze ratings from 44 participants for  
130 80 sentence contexts truncated before the critical article. Noun cloze ratings were obtained by  
131 first truncating the sentences after the critical articles, and presenting two different,



132 counterbalanced lists of 80 sentences to 30 participants each, such that a given participant  
133 only saw each sentence context with the expected or the unexpected article. The obtained  
134 values closely resemble those of the original study, with the same range (0-100% for articles  
135 and nouns), slightly lower median values (for articles and nouns, 29% and 40%, compared to  
136 31% and 46% in the original study), but slightly higher mean values (for articles and nouns,  
137 41% and 46%, compared to 36% and 44%). Because the sentence materials we used describe  
138 common situations that can be understood by any English speaker, and because students at  
139 the University of Edinburgh come from across the whole of the UK, we had no *a priori*  
140 expectation that cloze ratings would differ substantially across laboratories, and thus we did  
141 not obtain cloze norms from other sites. Consistently, nothing in our results suggests stronger  
142 cloze effects in University of Edinburgh students compared to other students, suggesting that  
143 our cloze norms are sufficiently representative for the other universities.

144       **Participants.** Participants were students from the University of Birmingham, Bristol,  
145 Edinburgh, Glasgow, Kent, Oxford, Stirling, York, or volunteers from the participant pool of  
146 University College London or Oxford University, who received cash or course credit for  
147 taking part in the ERP experiment. Participant information and EEG recording information  
148 per laboratory is available online (Supplementary Table 3). We pre-registered a target sample  
149 size of 40 participants per laboratory, which was thought to give at least 32 participants (the  
150 sample size of DeLong et al.) per laboratory after accounting for data loss, as was later  
151 confirmed. Due to logistic constraints, not all laboratories reached an N of 40. Because in two  
152 labs corruption of data was incorrectly assumed before computing trial loss, these  
153 laboratories tested slightly more than 40 participants. All participants ( $N = 356$ ; 222 women)  
154 were right-handed, native English speakers with normal or corrected-to-normal vision,  
155 between 18–35 years (mean, 19.8 years), free from any known language or learning disorder.  
156 Eighty-nine participants reported a left-handed parent or sibling.

157           **Procedure.** After giving written informed consent, participants were tested in a single  
158 session. Written sentences were presented in the center of a computer display, one word at a  
159 time (200 ms duration, 500 ms stimulus onset asynchrony). Participants were instructed to  
160 read sentences for comprehension and answer yes/no comprehension questions by pressing  
161 hand-held buttons. The electroencephalogram (EEG) was recorded from at least 32  
162 electrodes.

163           The replication experiment was followed by a control experiment, which served to  
164 detect sensitivity to the correct use of the a/an rule in our participants. Participants read 80  
165 relatively short sentences (average length 8 words, range 5-11) that contained the same  
166 critical words as the replication experiment, preceded by a correct or incorrect article. As in  
167 the replication experiment, each critical word was presented only once, and was followed by  
168 at least one more word. All words were presented at the same rate as the replication  
169 experiment. There were no comprehension questions in this experiment. After the control  
170 experiment, participants performed a Verbal Fluency Test and a Reading Span test; the  
171 results from these tests are not discussed here. All stimulus presentation scripts are publicly  
172 available in two different software packages (E-Prime and Presentation) on  
173 <https://osf.io/eyzaq>.

174           **Data processing.** Data processing was performed in BrainVision Analyzer 2.1(Brain  
175 Products, Germany). We performed one pre-registered replication analysis that followed the  
176 DeLong et al. analysis as closely as possible and one pre-registered single-trial analysis  
177 (Open Science Framework, <https://osf.io/eyzaq>). All non-pre-registered analyses are  
178 considered as exploratory. First, we interpolated bad channels from surrounding channels,  
179 and downsampled to a common set of 22 EEG channels per laboratory which were similar in  
180 scalp location to those used by DeLong et al. For one laboratory that did not have all the  
181 selected 22 channels, 12 virtual channels were created using topographic interpolation by

182 spherical splines. We then applied a 0.01-100 Hz digital band-pass filter (including 50 Hz  
183 Notch filter), re-referenced all channels to the average of the left and right mastoid channels  
184 (in a few participants with a noisy mastoid channel, only one mastoid channel was used), and  
185 segmented the continuous data into epochs from 500 ms before to 1000 ms after word onset.  
186 We then performed visual inspection of all data segments and rejected data with amplifier  
187 blocking, movement artifacts, or excessive muscle activity. Subsequently, we performed  
188 independent component analysis<sup>2</sup>, based on a 1-Hz high-pass filtered version of the data, to  
189 correct for blinks, eye movements or steady muscle artefacts. After this, we automatically  
190 rejected segments containing a voltage difference of over 120  $\mu\text{V}$  in a time window of 150  
191 ms or containing a voltage step of over 50  $\mu\text{V}/\text{ms}$ . Participants with fewer than 60 article  
192 trials or 60 noun trials were removed from the analysis, leaving a total of 334 participants  
193 (range across laboratories 32-42, and therefore each lab had a sample size at least as large as  
194 DeLong et al.). On average, participants had 77 article trials and 77 noun trials.

195 **Replication analysis.** We applied a 4<sup>th</sup>-order Butterworth band-pass filter at 0.2-15  
196 Hz to the segmented data, averaged trials per participant within 10% cloze bins (0-10, 11-20,  
197 etc. until 91-100), and then averaged the participant-wise averages separately for each  
198 laboratory. Because the bins did not contain equal numbers of trials (the intermediate bins  
199 contained fewest trials), like in DeLong et al., not all participants contributed a value for each  
200 bin to the grand average per laboratory. For nouns and articles separately, and for each EEG  
201 channel, we computed the correlation between ERP amplitude in the 200-500 ms time  
202 window per bin with the average cloze probability per bin.

203 We point out that this correlation analysis reduces an initially large pool of at least  
204 2560 potential data points per lab (32 or more subjects who each read 80 sentences), to 10  
205 grand-average values, by averaging N400 responses over trials within 10 cloze probability  
206 decile-bins (cloze 0-10, 11-20, et cetera), per participant and then averaging over participants,

207 even though these bins held greatly different numbers of observations. Correlating these 10  
208 values with the average cloze value per bin yields correlation coefficients with large  
209 confidence intervals (for example, the Cz electrode in DeLong et al. showed a statistically  
210 significant  $r$ -value of 0.68 with a 95% confidence interval ranging from 0.09 to 0.92). By  
211 discretizing cloze probability into deciles and not distinguishing various sources of subject-,  
212 item-, bin-, and trial-level variation, this analysis potentially compromises power.  
213 Furthermore, treating subjects as fixed rather than random potentially inflates false positive  
214 rates, due to the confounding of the overall cloze effect with by-subject variation in the  
215 effect<sup>3-4</sup>. Therefore, our study also seeks to improve upon DeLong et al.'s original data  
216 analysis with a pre-registered single-trial analysis.

217 **Pre-registered single-trial analysis.** In this analysis we did not apply the 0.2-15 Hz  
218 band-pass filter, which carries the risk of inducing data distortions<sup>5-6</sup>. For each trial, we  
219 performed baseline correction by subtracting the mean voltage of the -100 to 0 ms time  
220 window from the data. This common procedure corrects for spurious voltage differences  
221 before word onset, generating confidence that observed effects are elicited by the word rather  
222 than differences in brain activity that already existed before the word. Baseline correction is a  
223 standard procedure in ERP research<sup>5</sup>, and although it was not used or not reported in DeLong  
224 et al, it has been used in many other publications from the same lab. On the basis of a review  
225 of the published work from this lab (i.e. the Kutas Cognitive Electrophysiology Lab, we have  
226 identified the 100 pre-stimulus baseline as the most frequently used one in similar studies.

227 Instead of averaging N400 data for subsequent statistical analysis, we performed linear  
228 mixed effects model analysis<sup>7</sup> of the single-trial N400 data, using the “lme4” package<sup>8</sup> in the  
229 R software<sup>9</sup>. This approach simultaneously models variance associated with each subject and  
230 with each item. Using a spatiotemporal region-of-interest approach based on the DeLong et  
231 al. results, our dependent measure (N400 amplitude) was the average voltage across 6 centro-

232 parietal channels (Cz/C3/C4/Pz/P3/P4) in the 200-500 ms window for each trial. Analysis  
233 scripts and data to run these scripts are publicly available on <https://osf.io/eyzaq>.

234 For articles and nouns separately, we used a maximal random effects structure as justified  
235 by the design<sup>4</sup>, which did not include random effects for ‘laboratory’ as there were only 9  
236 laboratories, and laboratory was not a predictor of theoretical interest. Z-scored cloze was  
237 entered in the model as a continuous variable that had two possible values for each item  
238 (corresponding to relatively expected and unexpected words), and laboratory was entered as a  
239 deviation-coded categorical variable. We tested the effects of ‘laboratory’ and ‘cloze’ through  
240 model comparison with a  $\chi^2$  log-likelihood test. We tested whether the inclusion of a given  
241 fixed effect led to a significantly better model fit. The first model comparison examined  
242 laboratory effects, namely whether the cloze effect varied across laboratories (cloze-by-  
243 laboratory interaction) or whether the N400 magnitudes varied over laboratory (laboratory  
244 main effect). If laboratory effects were nonsignificant, we dropped them from the analysis to  
245 simplify interpretation. For the articles and nouns separately, we compared the subsequent  
246 models below. Each model included the random effects associated with the fixed effect  
247 ‘cloze’<sup>4</sup>. All output  $\beta$  estimates and 95% confidence intervals (CI) were transformed from z-  
248 scores back to raw scores, and then back to the 0-100% cloze range, so that the voltage  
249 estimates represent the change in voltage associated with a change in cloze probability from 0  
250 to 100.

251 Model 1:  $N400 \sim \text{cloze} * \text{laboratory} + (\text{cloze} | \text{subject}) + (\text{cloze} | \text{item})$

252 Model 2:  $N400 \sim \text{cloze} + \text{laboratory} + (\text{cloze} | \text{subject}) + (\text{cloze} | \text{item})$

253 Model 3:  $N400 \sim \text{cloze} + (\text{cloze} | \text{subject}) + (\text{cloze} | \text{item})$

254 Model 4:  $N400 \sim (\text{cloze} | \text{subject}) + (\text{cloze} | \text{item})$

255 We also tested the differential effect of cloze on article ERPs and on noun ERPs by  
256 comparing models with and without an interaction between cloze and the deviation-coded

257 factor ‘wordtype’ (article/noun). Random correlations were removed for the models to  
258 converge.

259 Model 1:  $N400 \sim \text{cloze} * \text{wordtype} + (\text{cloze} * \text{wordtype} \parallel \text{subject}) + (\text{cloze} * \text{wordtype} \parallel$   
260  $\text{item})$

261 Model 2:  $N400 \sim \text{cloze} + \text{wordtype} + (\text{cloze} * \text{wordtype} \parallel \text{subject}) + (\text{cloze} * \text{wordtype} \parallel$   
262  $\text{item})$

263 **Exploratory single-trial analyses.** We noticed small ERP effects of cloze in the time  
264 window before article onset in laboratories 1, 3, 4, 6, 8 and 9, and a slow drift effect of cloze  
265 immediately at article onset in laboratory 8 (Supplementary Figures showing all electrodes  
266 are available on <https://osf.io/eyzaq>). We therefore performed an exploratory analysis in the  
267 500 to 100 ms time window *before* the article, using the originally (-100 to 0 ms) baselined  
268 data, using Model 3 and 4 from the article analysis. This window covers the first 400 ms of  
269 the word that preceded the article. Because analysis in this window yielded a similar pattern  
270 as in the pre-registered analysis, we then performed exploratory analyses with longer (200 ms  
271 or 500 ms) pre-article baselines to better account for pre-article voltage levels (these windows  
272 are also often used in the Kutas laboratory). We also performed an exploratory analysis with  
273 the original baseline but an additional 0.1 Hz high-pass filter applied before baseline  
274 correction. We used this filter because it is frequently used in the Kutas laboratory and  
275 removes slow signal drift without impacting N400 activity (which has a higher-frequency  
276 spectrum)<sup>5-6</sup>. The results of these exploratory analyses did not change our conclusions and are  
277 shown in Supplementary Figure 1.

278 We note that our conclusions based on the single-trial analysis of the article data and  
279 noun data hold even when analyzing only those participants with an accuracy score at least as  
280 high as the lowest subject-accuracy reported in the original study (88%, reducing our sample  
281 to 161 participants, still 5 times larger than that of DeLong et al.). Although these analyses

282 are not reported in the main text, they can be reproduced from our online data set, which  
283 includes the accuracy and stimulus list-version of each participant.

284 **Exploratory Bayesian analyses.** Supplementing the Replication analysis, we  
285 performed a Bayes factor analysis for correlations<sup>10</sup> using as prior the size and direction of  
286 the effect reported in the original study. This test was performed for each electrode  
287 separately, after collapsing the data points from the different laboratories. Because we had no  
288 articles in the 40-50 % cloze bin, there was a total of 9 and 10 data points per laboratory for  
289 the articles and nouns, respectively. Our analysis used priors estimated from the DeLong et al  
290 results matched as closely as possible to our electrode locations. A Bayes factor between 3  
291 and 10 is considered moderate evidence, between 10-30 is considered strong evidence, 30-  
292 100 is very strong evidence, and values over 100 are considered extremely strong evidence.  
293 In addition to using a 100 ms pre-stimulus baseline, we also computed the replication Bayes  
294 factors using a 500 ms pre-stimulus time window for baseline correction. Results are shown  
295 in Figure 1.

296 Supplementing the single-trial analyses, we performed Bayesian mixed-effects model  
297 analysis using the brms package for R<sup>11</sup>, which fits Bayesian multilevel models using the  
298 Stan programming language<sup>12</sup>. We used a prior based on the DeLong et al. observed effect  
299 size at Cz for a difference between 0% cloze and 100% cloze (1.25  $\mu$ V and 3.75  $\mu$ V for  
300 articles and nouns, respectively) and a prior of zero for the intercept. Both priors had a  
301 normal distribution and a standard deviation of 0.5 (given the a priori expectation that  
302 average ERP voltages in this window generally fluctuate on the order of a few microvolts;  
303 note that these units are expressed in terms of the z-scored cloze values, rather than the  
304 original cloze values, such that  $\mu$  for the cloze prior was 0.45, which corresponds to a raw  
305 cloze effect of 1.25). We computed estimates and 95% credible intervals for each of the  
306 mixed-effects models we tested, and transformed these back into raw cloze units. The

307 credible interval is the range of values such that one can be 95% certain that it contains the  
308 true effect, given the data, priors and the model. The results from these analyses did not  
309 change our conclusions and are shown in Supplementary Figure 2.

310 **Control experiment.** Analysis of the control experiment involved a comparison  
311 between a model with the categorical factor ‘grammaticality’ (grammatical/ungrammatical)  
312 and a model without. Our dependent measure (P600 amplitude<sup>13</sup>) was the average voltage  
313 across 6 centro-parietal channels (Cz/C3/C4/Pz/P3/P4) in the 500-800 ms window for each  
314 trial. Results are shown in Supplementary Figure 3.

315 Model 1: P600 ~ grammaticality + (grammaticality | subject) + (grammaticality | item)

316 Model 2: P600 ~ (grammaticality | subject) + (grammaticality | item)

## METHOD REFERENCES

<sup>1</sup> Taylor, W.L. *Journalism Quart.* **30**, 415-433 (1953).

<sup>2</sup> Jung, T.P., et al. *Psychophysiology.* **37**, 163-178 (2000).

<sup>3</sup> Clark, H.H. *J. Verb. Learn. Verb. Behav.* **12**, 335-359 (1973).

<sup>4</sup> Barr, D.J., Levy, R., Scheepers, C. & Tily, H.J. *J. Mem. Lang.* **68**, 255-278 (2013).

<sup>5</sup> Luck, S. J. MIT press, Cambridge MA, (2014).

<sup>6</sup> Tanner, D., Morgan-Short, K., & Luck, S. J. *Psychophysiology.* **52**, 997-1009 (2015).

<sup>7</sup> Baayen, R.H., Davidson, D.J. & Bates, D.M. *J. Mem. Lang.* **59**, 390-412 (2008).

<sup>8</sup> Bates, D., Maechler, M., Bolker, B., & Walker, S. *R package version*, **1** (2014).

<sup>9</sup> R CoreTeam, R Foundation for Statistical Computing. Vienna, Austria. URL

(<http://www.R-project.org/>). (2014)

<sup>10</sup> Wagenmakers, E.J., Verhagen, J. & Ly, A. *Behav. Res. Meth.* **48**, 413-426 (2016).

<sup>11</sup> Buerkner, P.C. *R package version* **1.4.0** (2016).

<sup>12</sup> Stan Development Team. R package version 2.14.1. <http://mc-stan.org>. (2016)



<sup>13</sup> Osterhout, L. & Holcomb, P.J. *J. Mem. Lang.* **31**, 785-806 (1992).

### **Author contributions**

M.S.N. and F.H. designed the research, M.S.N., D.J.B., G.R., and S.P.-A. planned the analysis. E.H., E.D., S.V.G.Z.W., F.B., V.K., A.I., S.B.-M., Z.F., E.K., S.P.-A., and Z.K. collected data. M.S.N., K.S., N.K., G.R., H.J.F., J.T., E.M.H., D.I.D., and S.R supervised data collection. M.S.N. and S.P.-A. analyzed the data. M.S.N. drafted the manuscript and received comments from S.P.-A., N.K., K.S., D.J.B., H.J.F., E.M.H, and F.H.

### **Acknowledgements**

This work was partly funded by ERC Starting grant 636458 to H.J.F.

### **Competing financial interests**

The authors declare no competing financial interests.

317 **Supplementary Figure 1. Exploratory single-trial analyses:** The relationship between cloze and ERP  
318 amplitude as illustrated by the mean ERP values per cloze value (number of observations reflected in circle  
319 size), along with the regression line and 95% confidence interval, from four exploratory analyses. We performed  
320 tests which used longer baseline time windows (200 ms, upper left panel; 500 ms, upper right panel) to better  
321 control for pre-article voltage levels, or which used the pre-registered baseline and applied a 0.1 Hz high-pass  
322 filter (lower left panel) to better control for slow signal drift (while presumably not affecting N400 activity). All  
323 three tests reduced the initially observed effect of article-cloze (200 ms baseline,  $\beta = .25$ , CI [-.12, .62],  $\chi^2(1) =$   
324 1.35,  $p = .19$ ; 500 ms baseline,  $\beta = .14$ , CI [-.25, .53],  $\chi^2(1) = 0.46$ ,  $p = .50$ ; 0.1 Hz filter:  $\beta = 0.09$ , CI [-.22, .41],  
325  $\chi^2(1) = 0.33$ ,  $p = .56$ ). An analysis in the 500 to 100 ms time window *before* article-onset (lower right panel)  
326 revealed a non-significant effect of cloze that resembled the pattern observed *after* article-onset,  $\beta = .16$ , CI [-  
327 .07, .39],  $\chi^2(1) = 1.82$ ,  $p = .18$ . Combined, these results suggest that the results obtained with the pre-registered  
328 analysis at least partly reflected the effects of slow signal drift that existed before the articles were presented.  
329

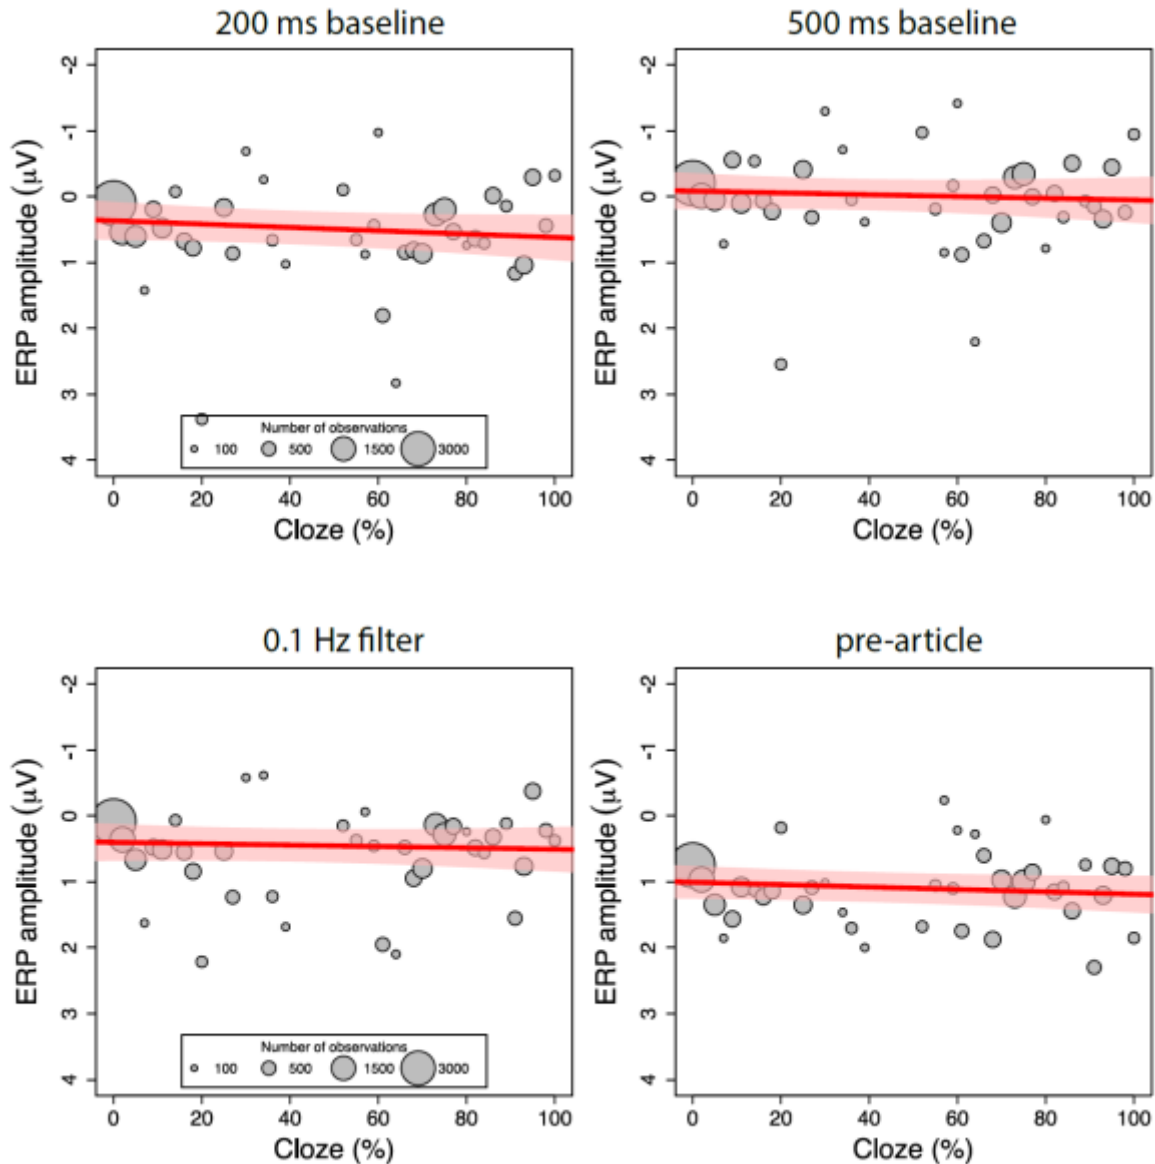

330 **Supplementary Figure 2.** Results from exploratory Bayesian mixed-effects model analyses, represented by  
331 posterior distributions for the effect of cloze on ERP amplitudes in the N400 window. The x-axis shows cloze  
332 effect sizes (i.e., changes in microvolts associated with an increase from 0% cloze probability to 100% cloze  
333 probability). The black line indicates the posterior distribution of effects; higher values of the posterior density  
334 at a given effect size indicate higher probability that this is the true effect size in the population. The peak of the  
335 posterior distribution roughly corresponds to the point estimate of the effect size (the regression coefficient)  
336 fitted from the Bayesian mixed effect model, i.e., the most likely value of the true effect size. The middle 95%  
337 of the posterior distribution, shaded in pink, corresponds to a two-tailed 95% credible interval for the effect  
338 size—i.e., an interval that we can be 95% confident contains the true effect. The green dotted line indicates the  
339 prior distribution (i.e., our expectation about where the true effect would lie before the data were collected),  
340 which is centered on  $1.25\mu\text{V}$ , the effect observed by DeLong and colleagues (2005). The black connected dots  
341 illustrate the ratio between the posterior and prior distribution (i.e., the Bayes Factor) at the effect size of  $0\mu\text{V}$ ;  
342 for example, a Bayes Factor of 4 suggests we can be 4 times more certain that the true effect is zero after having  
343 conducted this experiment than before, or, in other words, that the data increased our confidence in the null  
344 effect of zero fourfold. We performed these analyses for each of the linear mixed-effects model analysis we  
345 performed. We note that in all the article-analyses, the posterior probability of the estimated effect being greater  
346 than zero is around 80 or 90%, but this is also the case for the pre-stimulus variable, suggesting that the  
347 observed patterns arise before the articles are seen. In none of our article-analyses did zero lie outside the  
348 obtained credible interval, whereas for the nouns, zero lay outside the credible interval. These results are  
349 consistent with a failure to replicate the DeLong et al. article-effect and successful replication of the noun-effect.

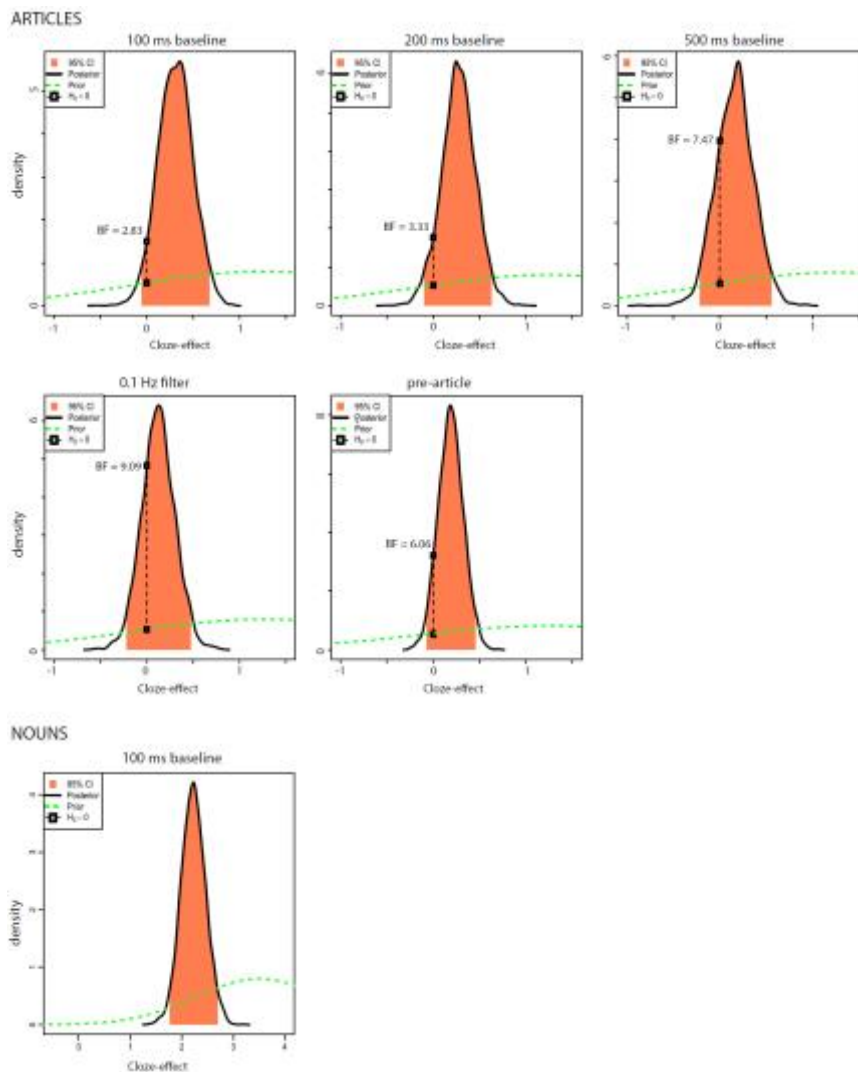

350 **Supplementary Figure 3.** P600 effects at electrode Pz per lab associated with flouting of the English a/an rule  
351 in the control experiment. Plotted ERPs show the grand-average difference waveform and standard deviation for  
352 ERPs elicited by ungrammatical expressions ('an kite') minus those elicited by grammatical expressions ('a  
353 kite'). This control experiment followed in the same experimental session as the main experiment and was  
354 carried to rule out that an observed lack of a statistically significant, article-elicited prediction effect in the main  
355 experiment reflected a general insensitivity of our participants to the a/an rule. In each laboratory, nouns  
356 following incorrect articles elicited a late positive-going waveform compared to nouns following correct  
357 articles, starting at about 500 ms after word onset and strongest at parietal electrodes. This standard P600 effect  
358 was confirmed in a single-trial analysis,  $\chi^2(1) = 83.09$ ,  $p < .001$ , and did not significantly differ between labs,  
359  $\chi^2(8) = 8.98$ ,  $p = .35$ .  
360

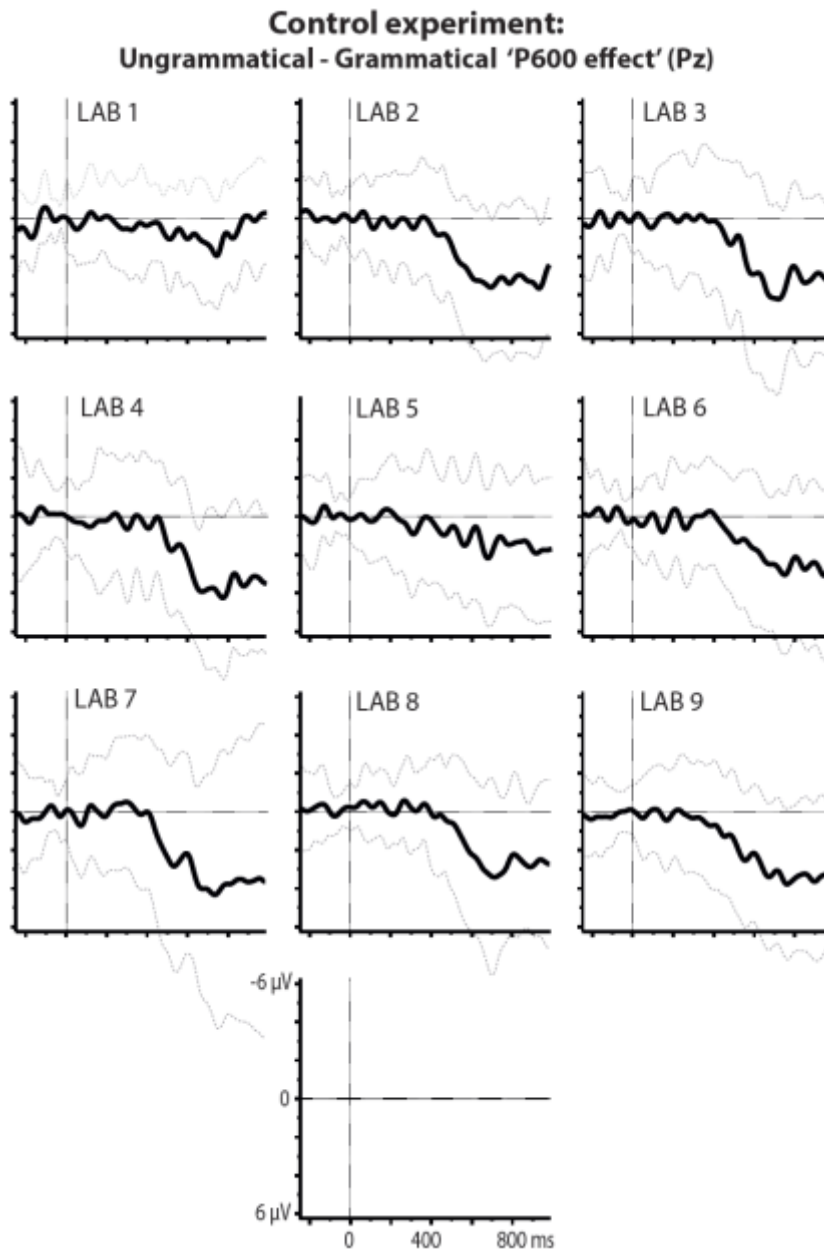

Source: https://www.biorxiv.org/content/10.1101/111807v2.full.pdf
